# Supplementary material
Source: PubMed Central journal article supplement (PMC6647786)
Supplement: ao9b01093_si_001.pdf [file ao9b01093_si_001.pdf]

## Supporting Information

### Discovery of furanone-based radiopharmaceuticals for diagnostic targeting of COX-1 in ovarian cancer

Md. Jashim Uddin,<sup>1\*</sup> Andrew J. Wilson,<sup>2</sup> Brenda C. Crews,<sup>1</sup> Paola Malerba,<sup>1,3</sup> Md. Imam Uddin,<sup>4</sup> Philip J. Kingsley,<sup>1</sup> Kebreab Ghebreselasie,<sup>1</sup> Cristina K. Daniel,<sup>1</sup> Michael L. Nickels,<sup>5</sup> Mohammed N. Tantawy,<sup>5</sup> Elma Jashim,<sup>1,6</sup> H. Charles Manning,<sup>5</sup> Dineo Khabele,<sup>2,7</sup> Lawrence J. Marnett<sup>1\*</sup>

### Corresponding Author

\*Md. Jashim Uddin, Phone: 615-484-8674, Fax: 615.343-0704, E-mail:

[jashim.uddin@vanderbilt.edu](mailto:jashim.uddin@vanderbilt.edu); and Lawrence J. Marnett, E-mail: [larry.marnett@vanderbilt.edu](mailto:larry.marnett@vanderbilt.edu).

## List of Contents

1.  $^1\text{H-NMR}$ ,  $^{13}\text{C-NMR}$ , HRMS spectra, and HPLC chromatogram of compds **1-7**.....pg# S3
2. Full-length Western blots.....pg# 3S1
3. Axial, coronal, and sagittal PET images of subcutaneous tumor .....pg# S32
4. Axial, coronal, and sagittal PET images of peritoneal tumor .....pg# S33

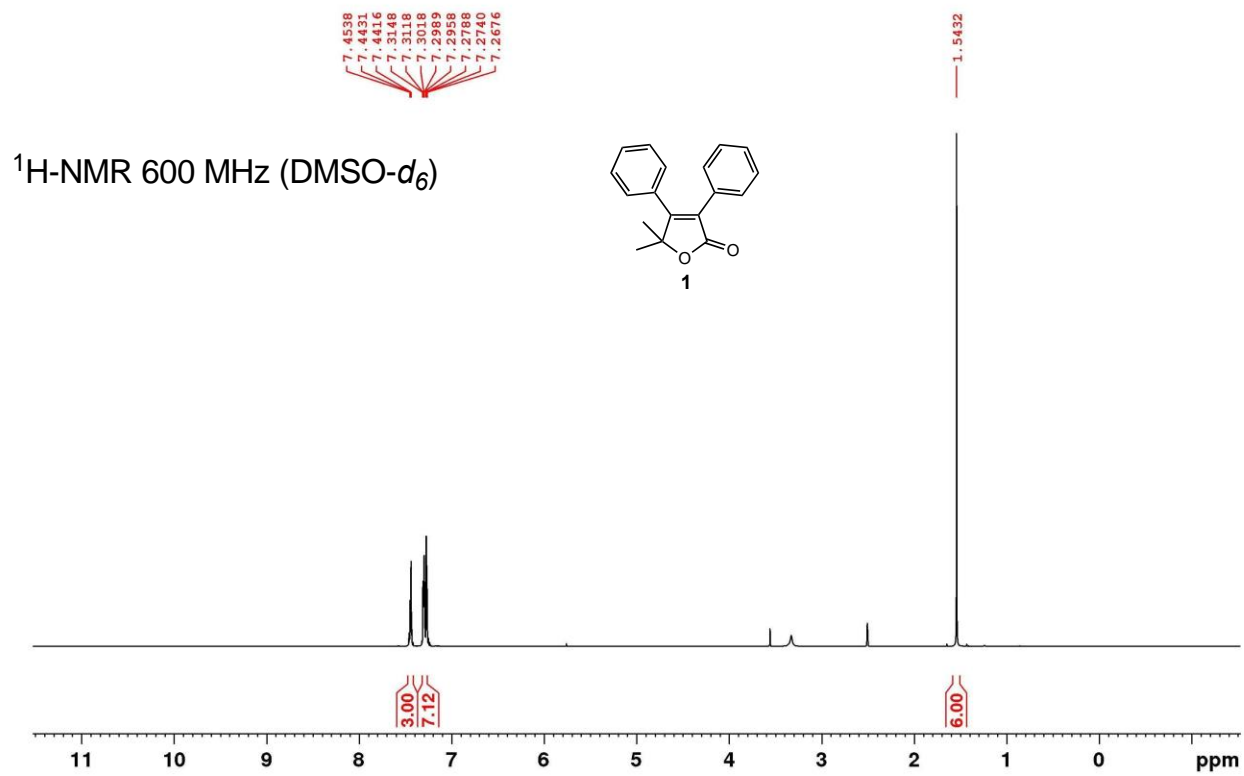

**Figure S1.** <sup>1</sup>H NMR spectrum of compound 1.

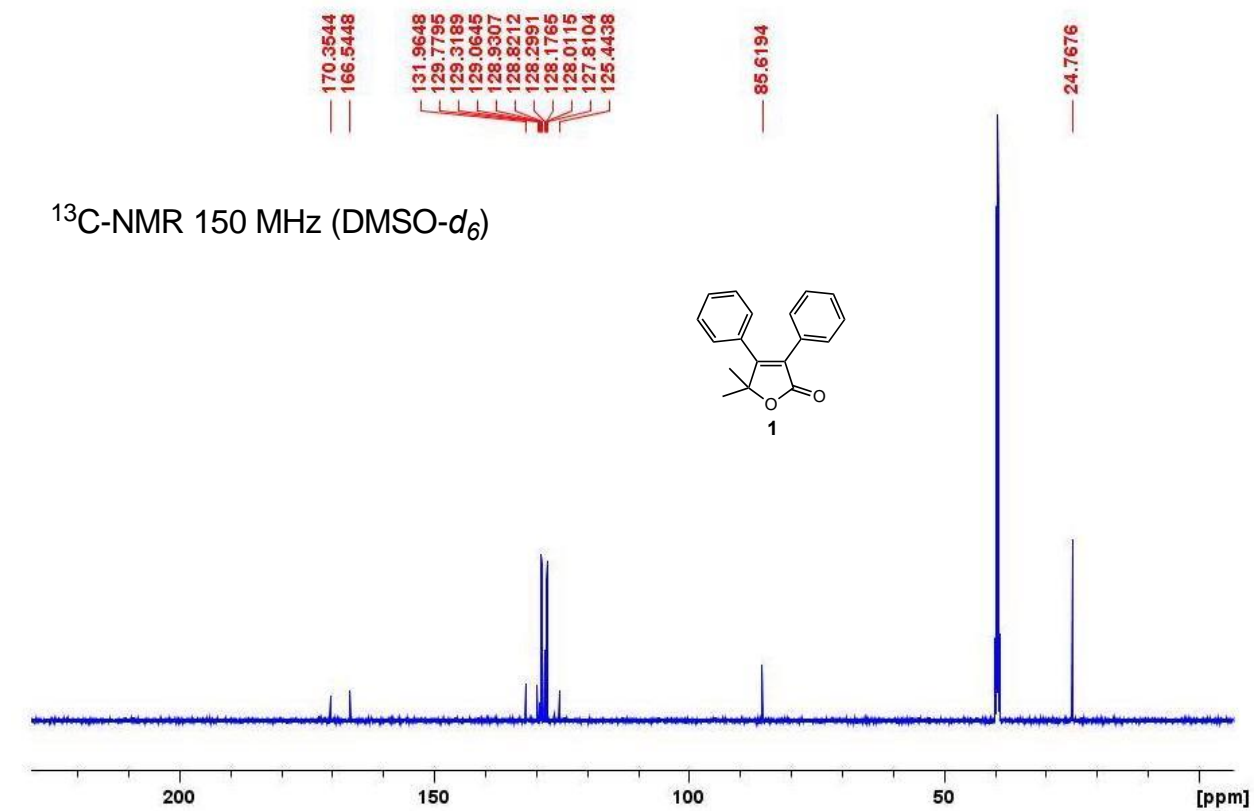

Figure S2. <sup>13</sup>C NMR spectrum of compound 1.

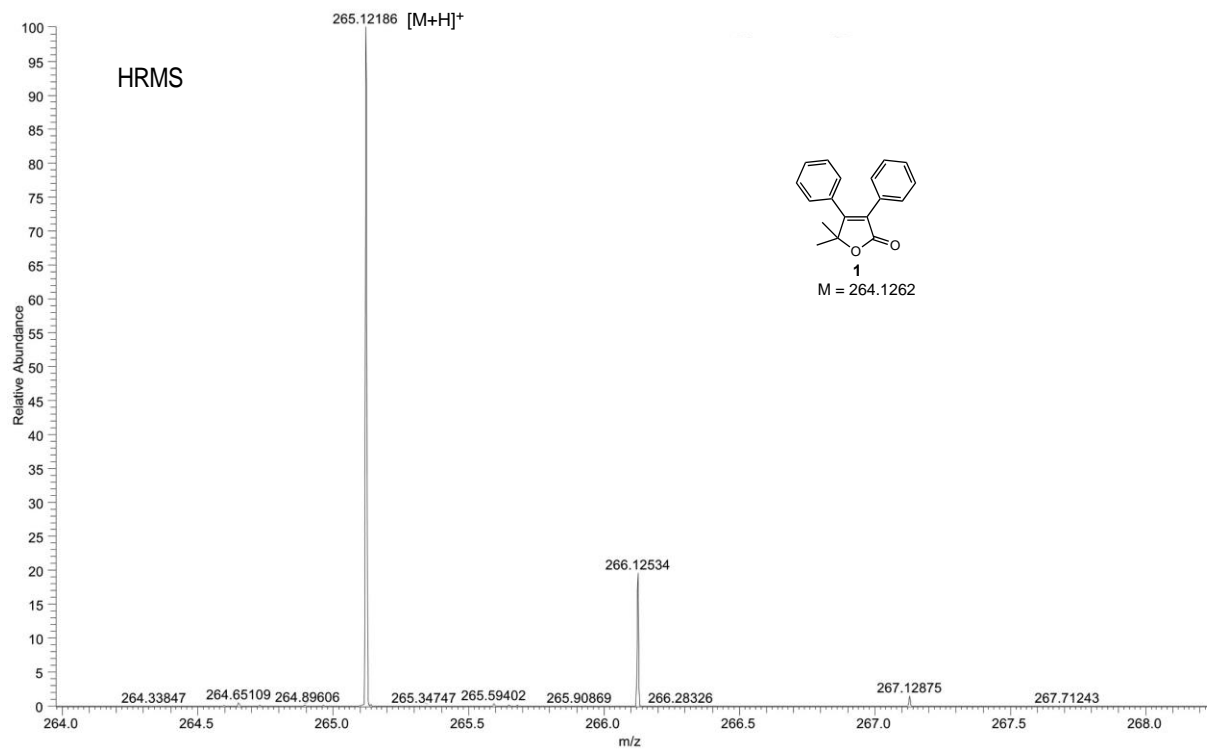

**Figure S3** HRMS spectrum of compound **1**,  $m/z$  calculated for  $[\text{C}_{18}\text{H}_{16}\text{O}_2 + \text{H}]^+$  265.1262, found 265.1218.

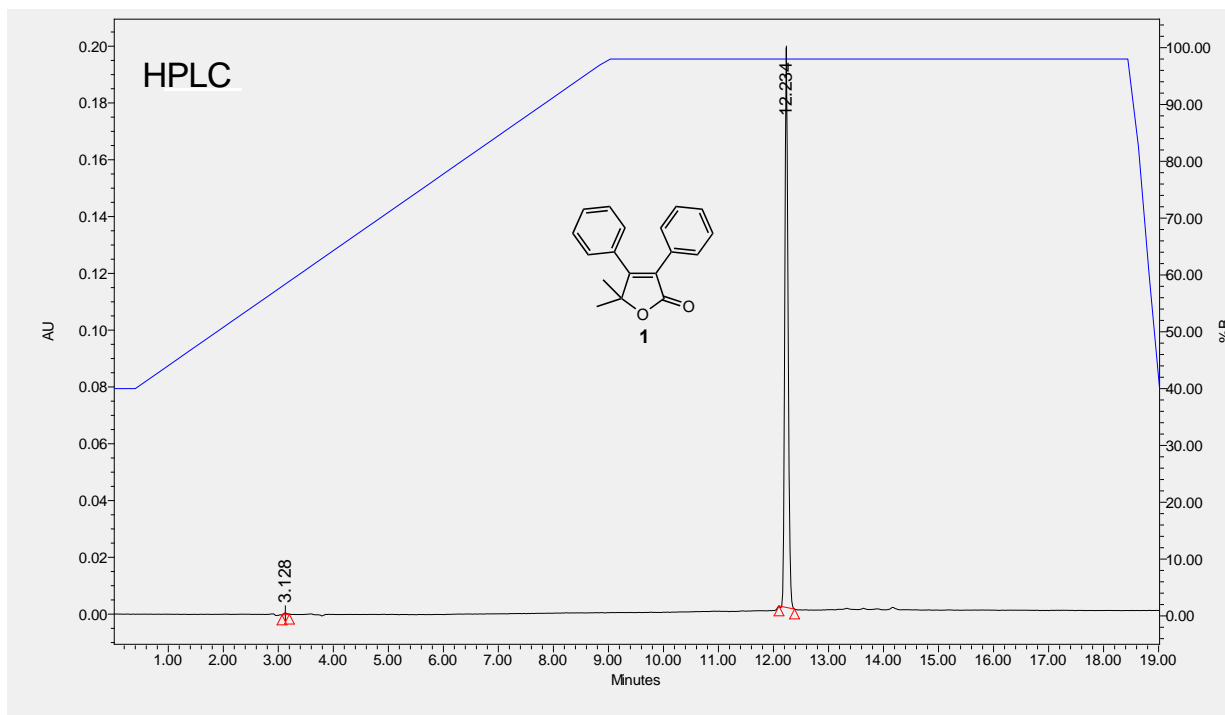

**Figure S4.** HPLC chromatogram of compound 1.

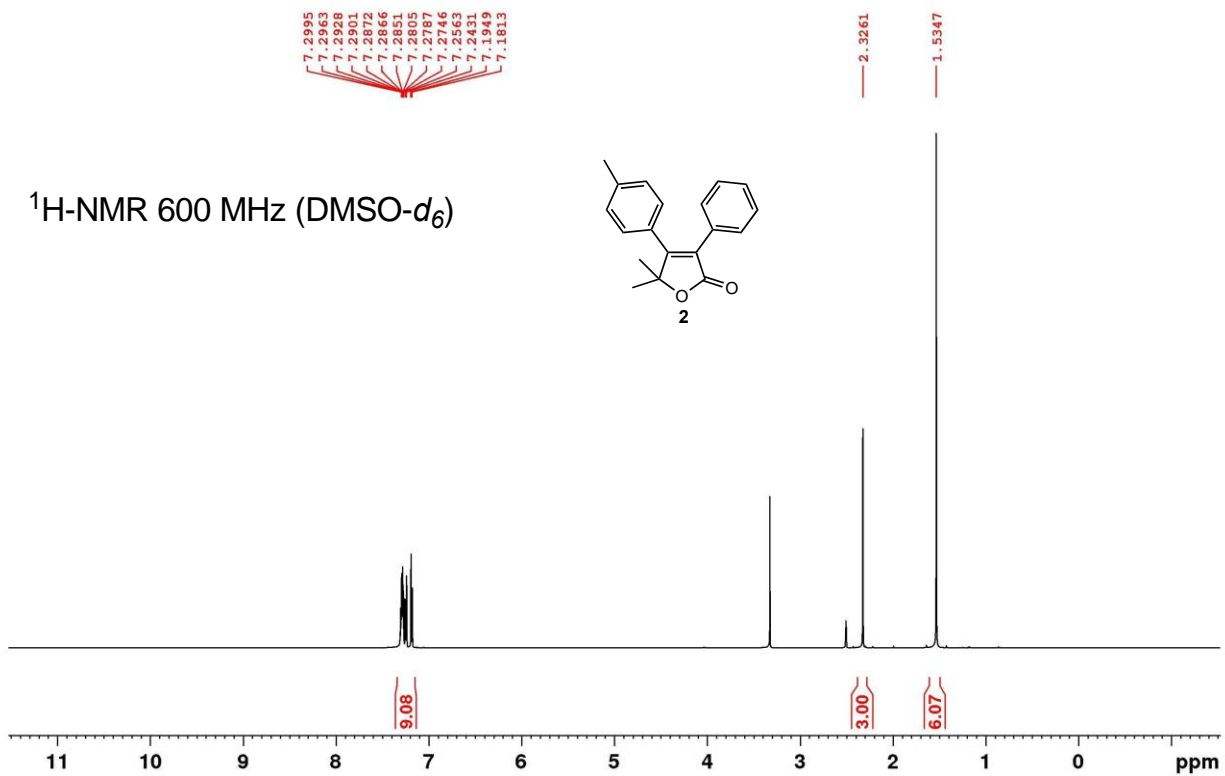

Figure S5. <sup>1</sup>H NMR spectrum of compound 2.

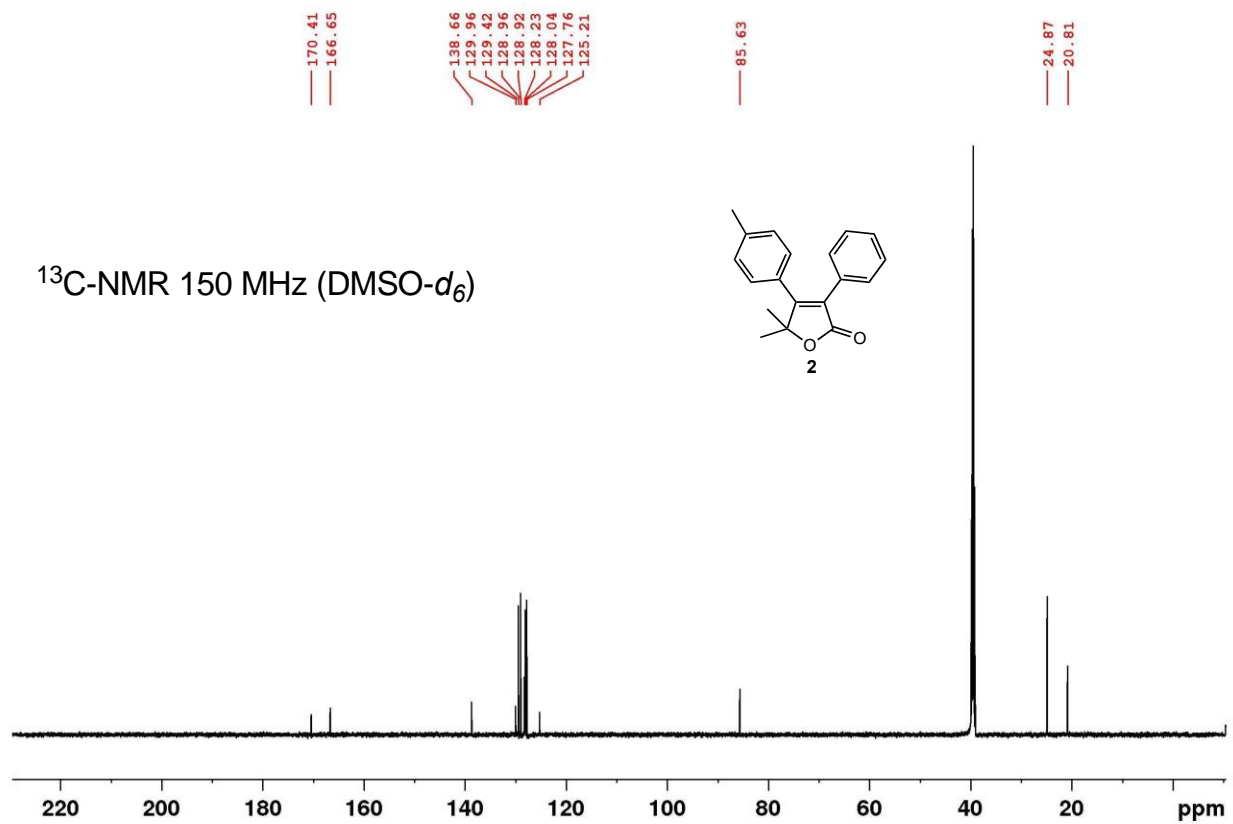

**Figure S6.** <sup>13</sup>C NMR spectrum of compound 2.



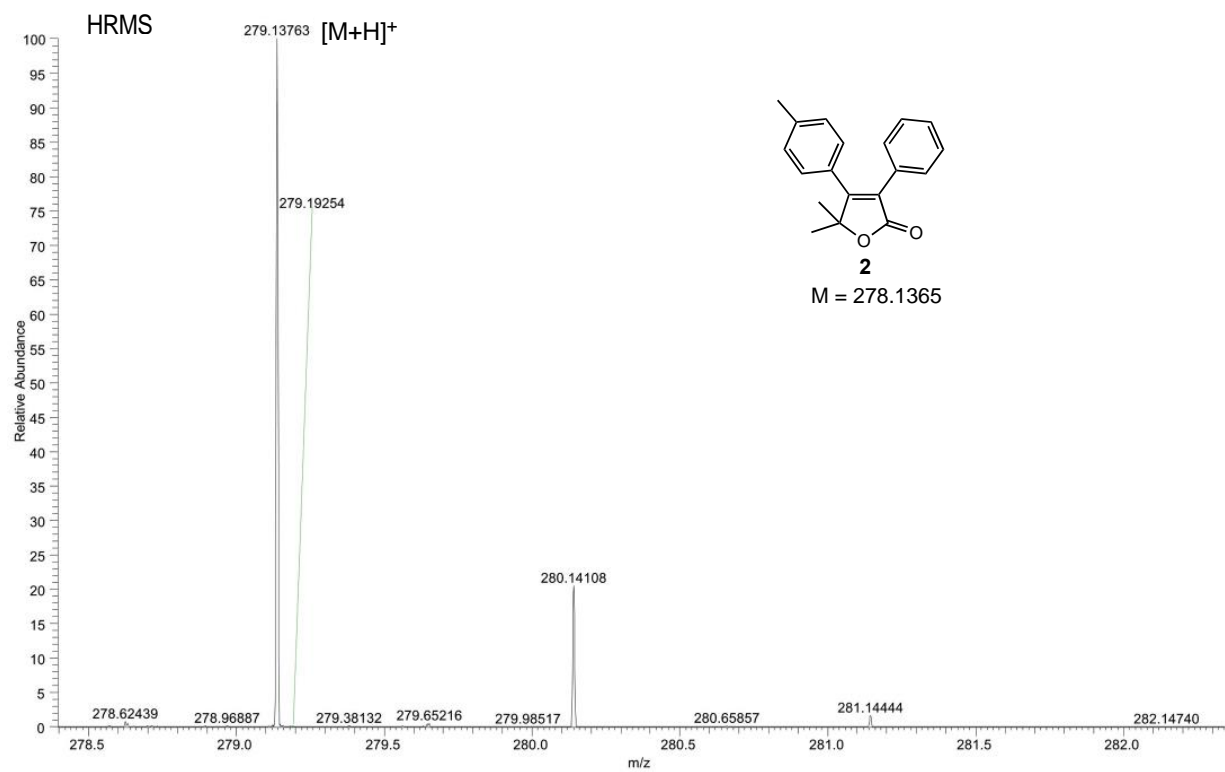

**Figure S7.** HRMS spectrum of compound **2**,  $m/z$  calculated for  $[C_{19}H_{18}O_2 + H]^+$  279.1365, found 279.1376.

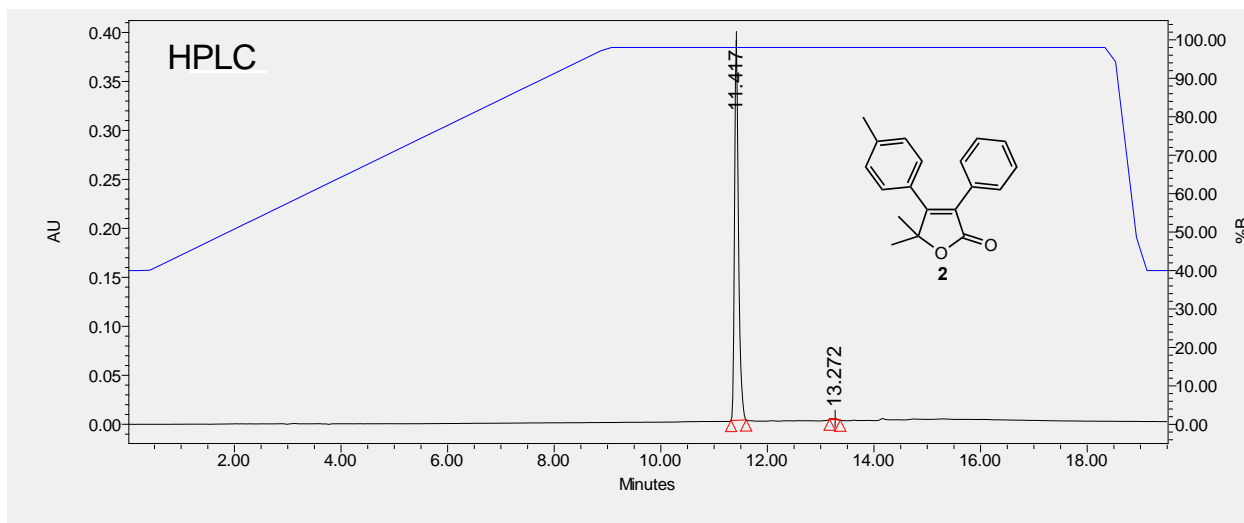

**Figure S8.** HPLC chromatogram of compound **2**.



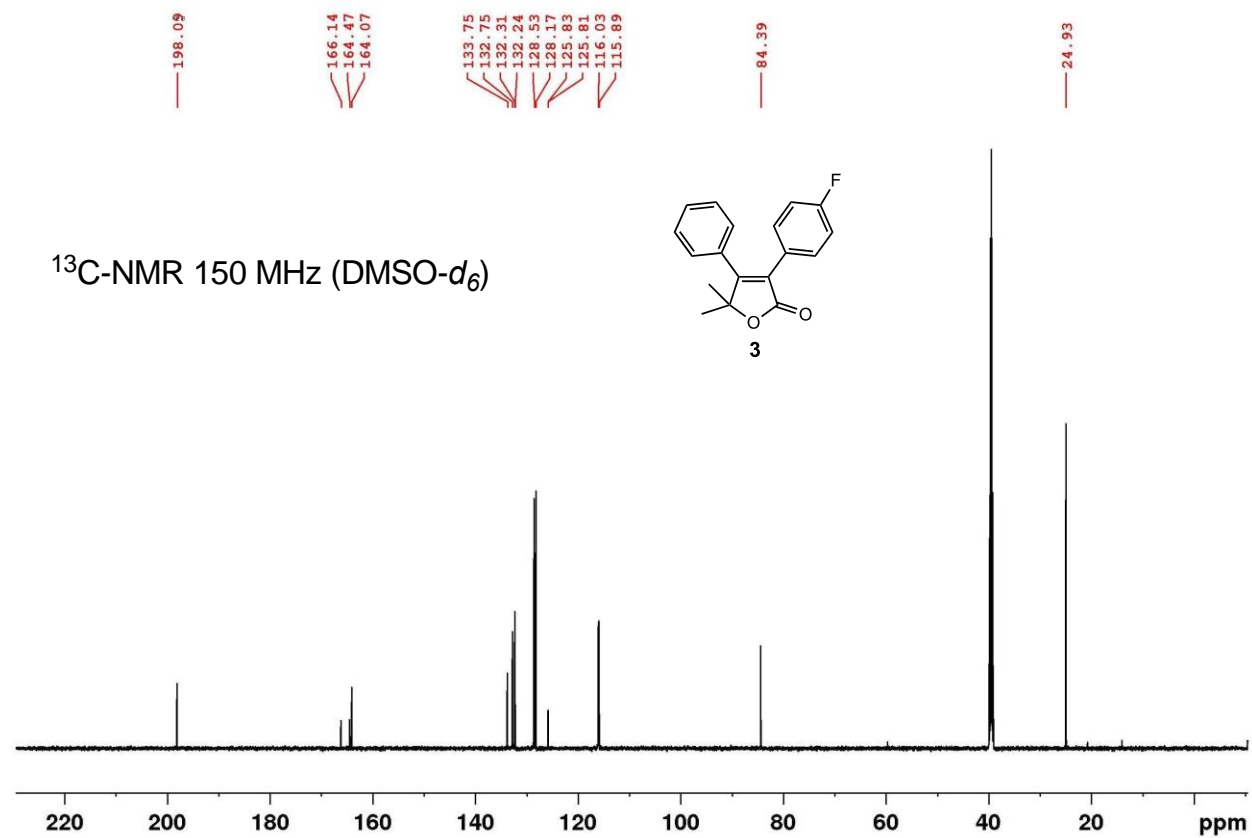

Figure S10.  $^{13}\text{C}$  NMR spectrum of compound **3**.

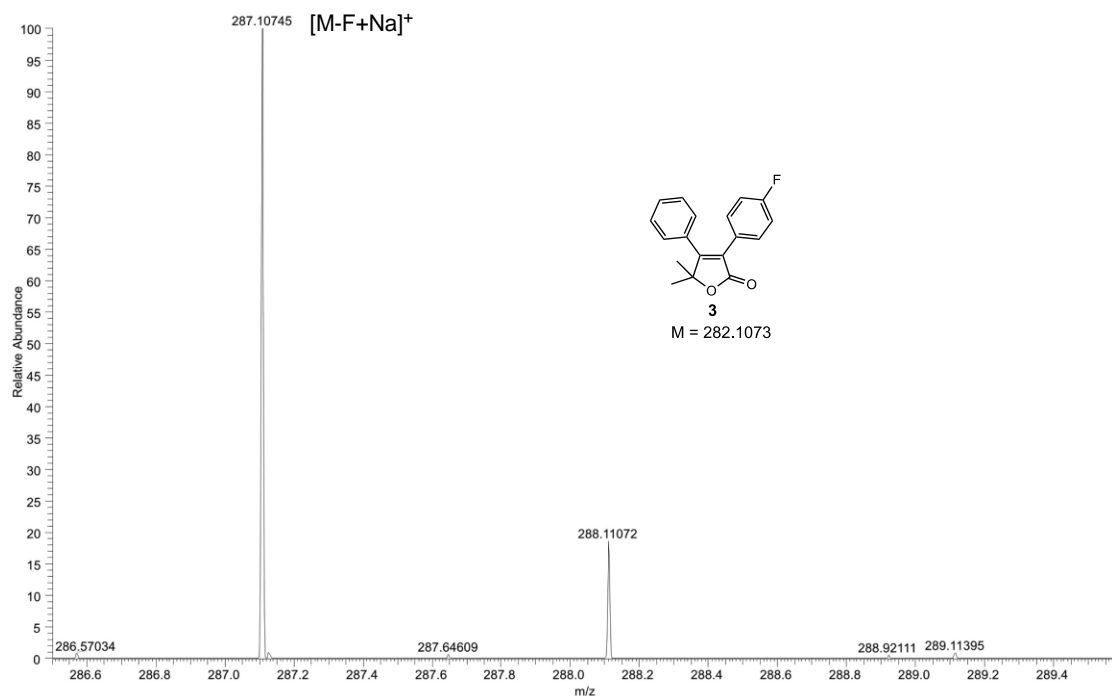

**Figure S11.** HRMS spectrum of compound **3**,  $m/z$  calculated for  $[C_{18}H_{15}FO_2 - F + Na]^+$  287.1073, found 287.1074.

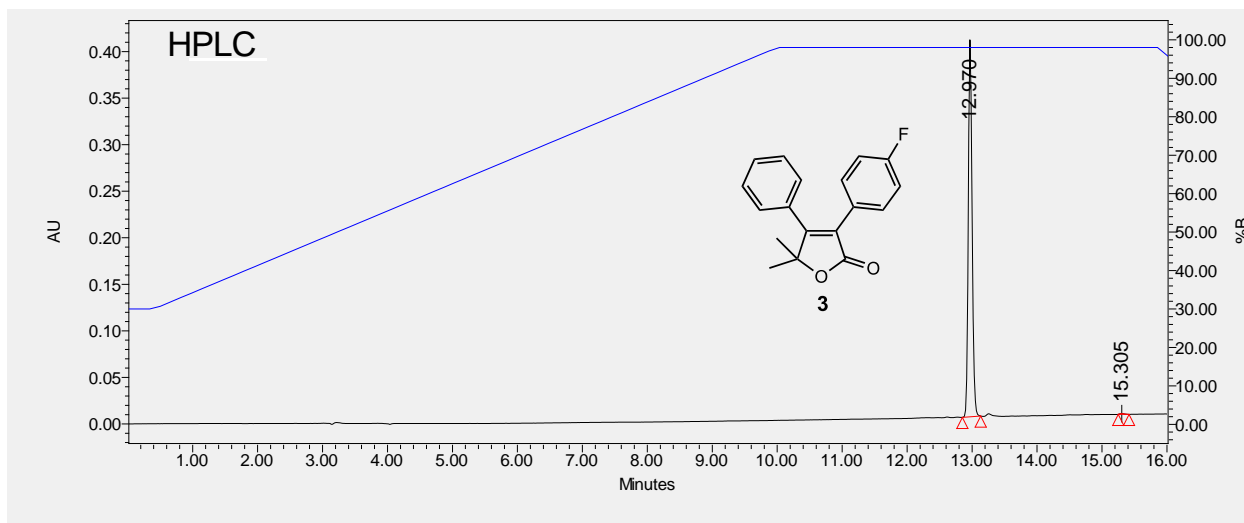

**Figure S12.** HPLC chromatogram of compound **3**.

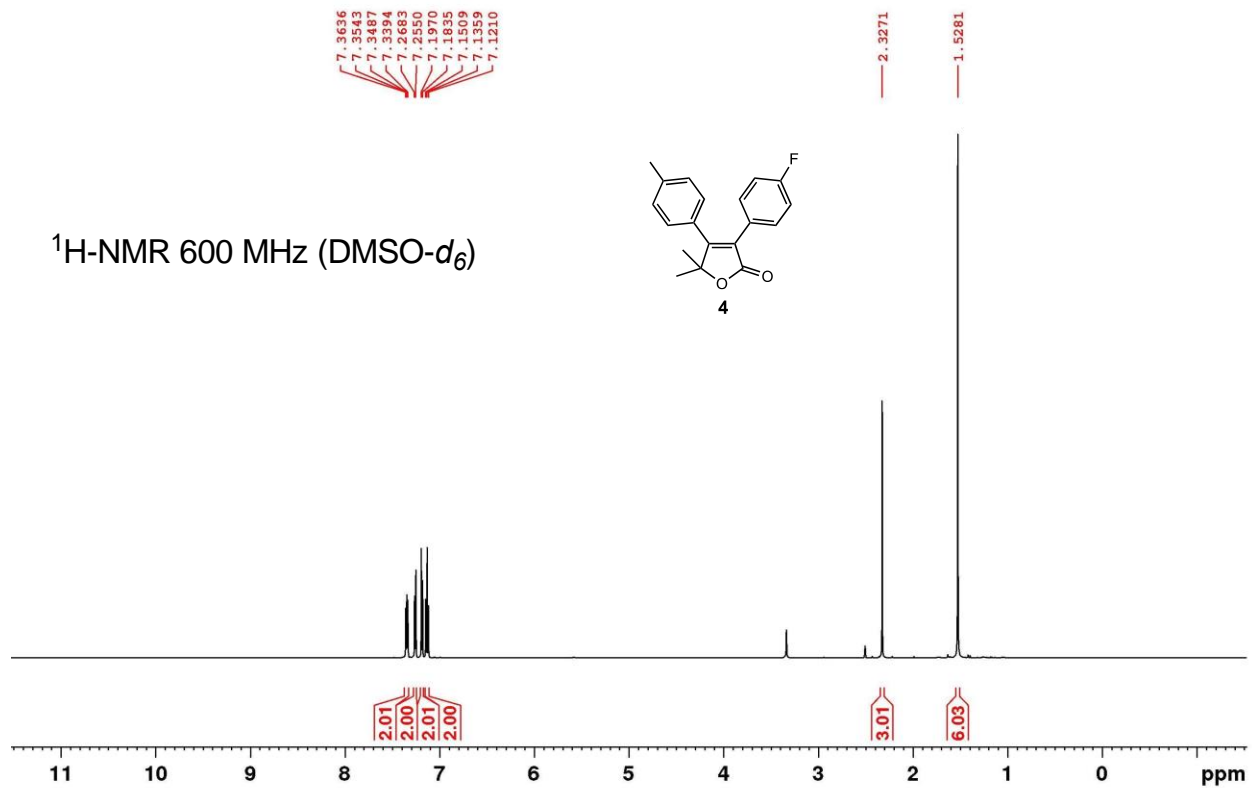

Figure S13. <sup>1</sup>H NMR spectrum of compound 4.

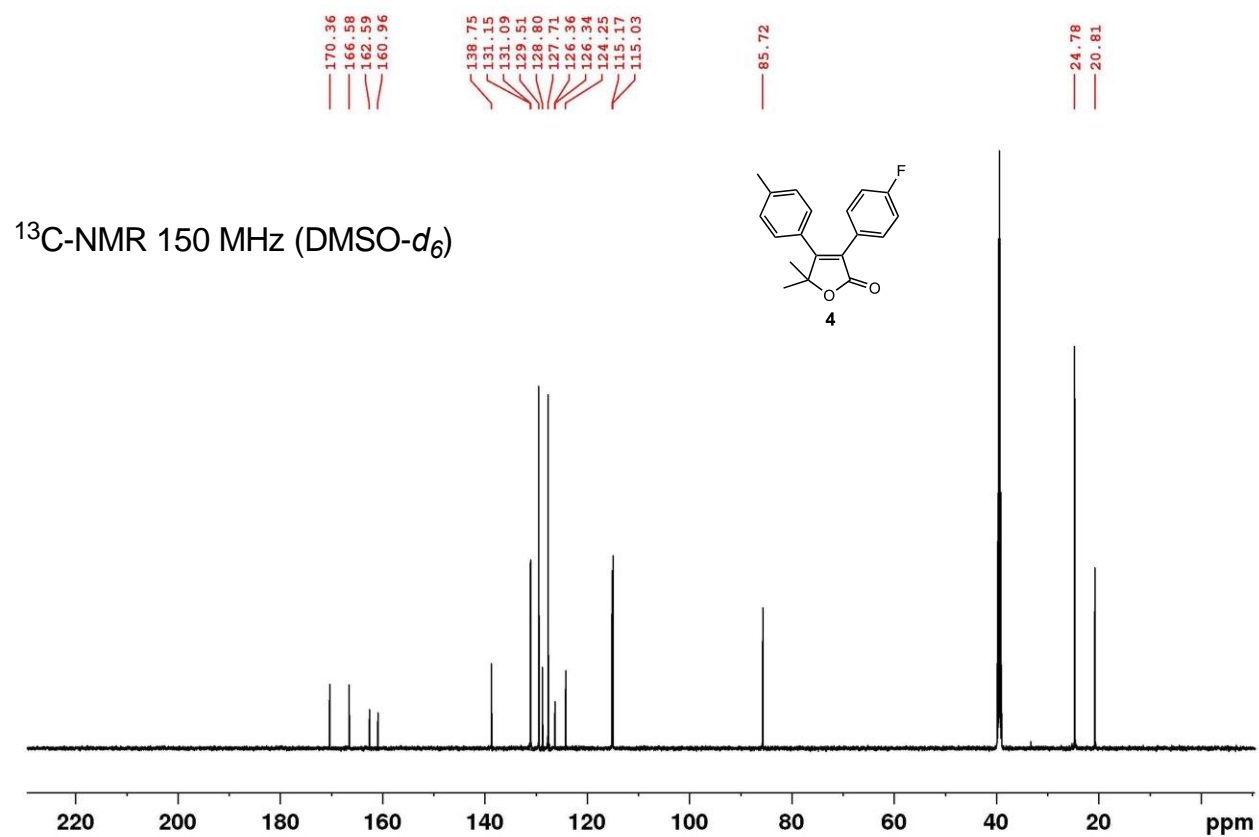

Figure S14.  $^{13}\text{C}$  NMR spectrum of compound 4.



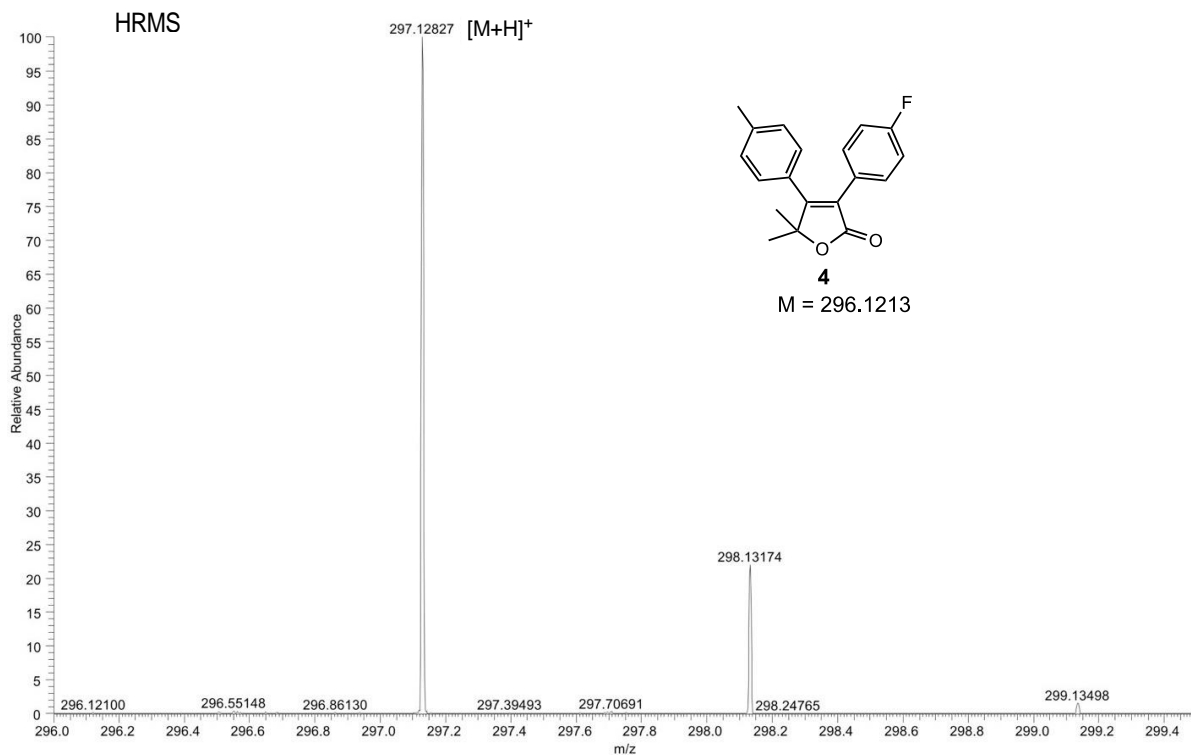

**Figure S15.** HRMS spectrum of compound **4**,  $m/z$  calculated for  $[C_{19}H_{17}FO_2 + H]^+$  297.1213, found 297.1282.

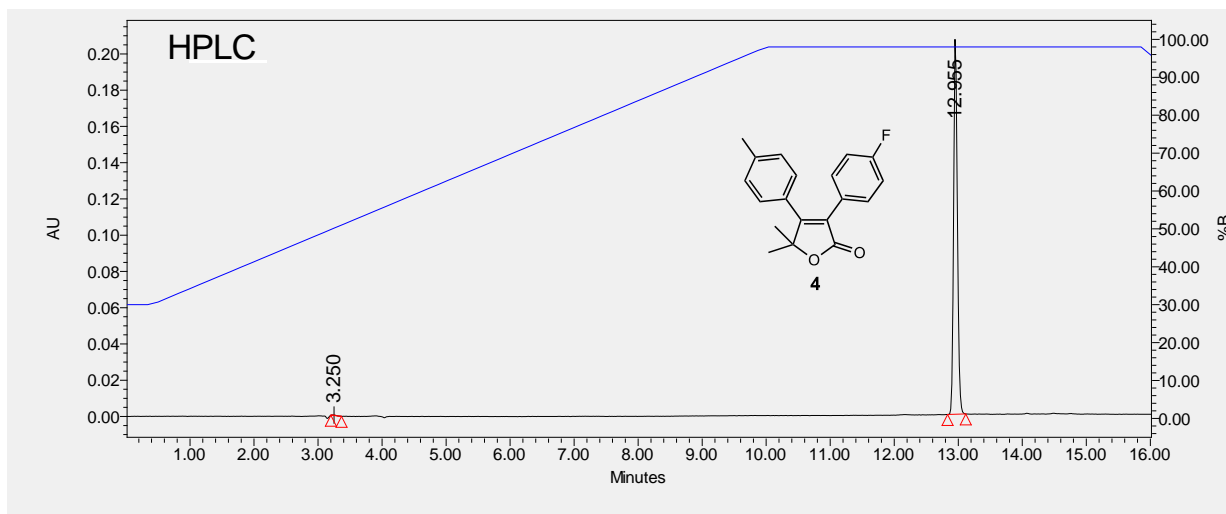

**Figure S16.** HPLC chromatogram of compound 4.

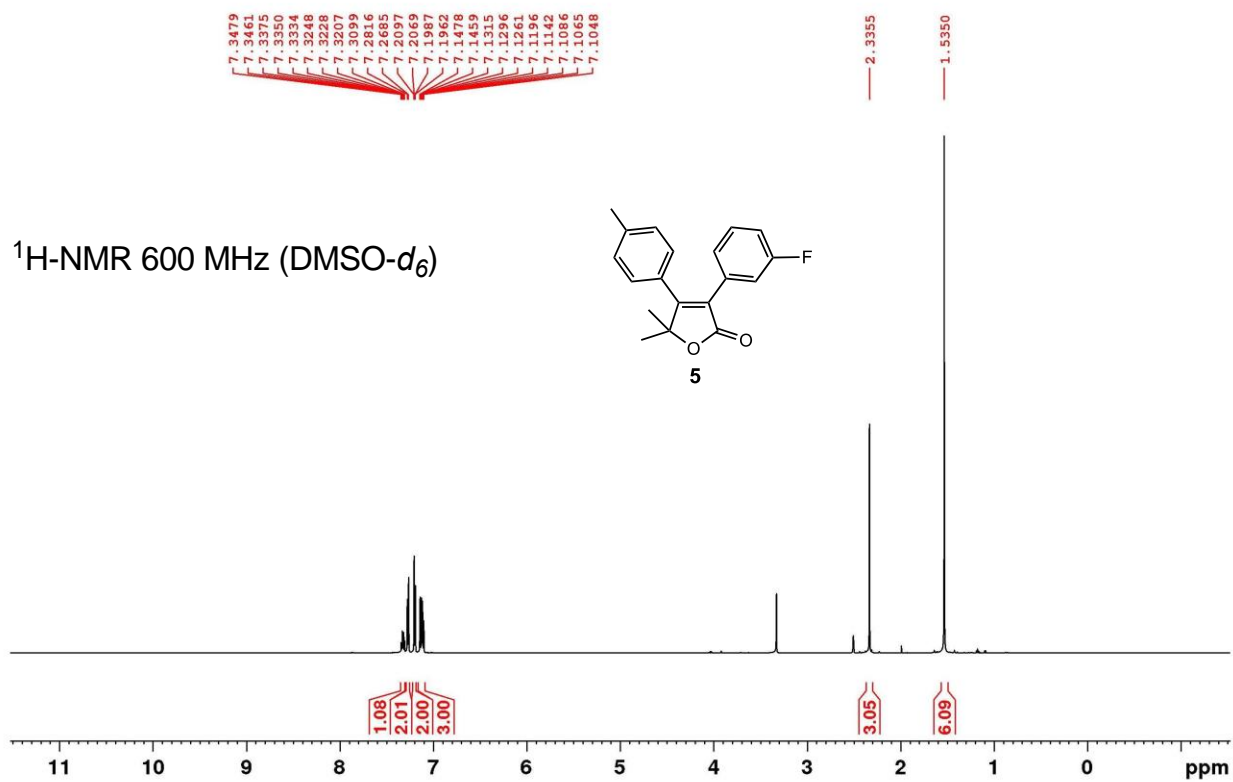

**Figure S17.**  $^1\text{H}$  NMR spectrum of compound **5**.

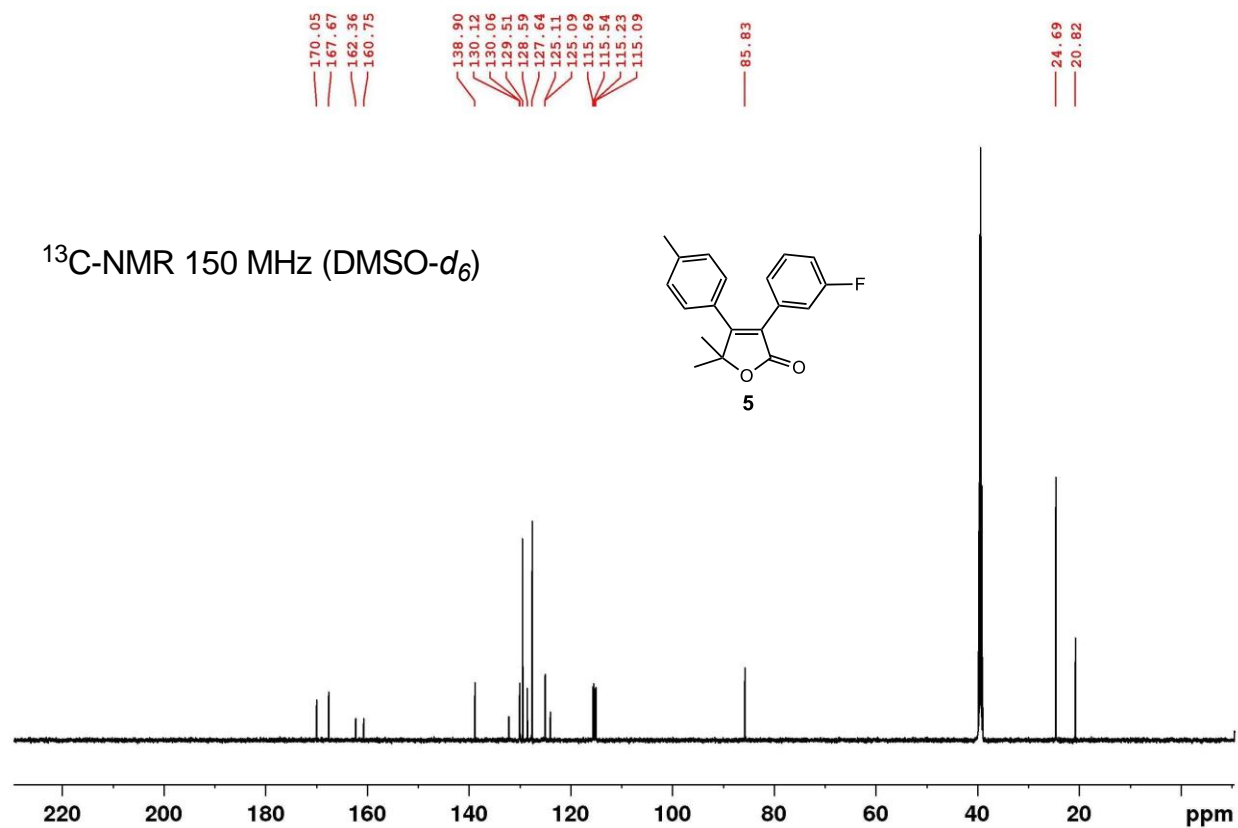

Figure S18.  $^{13}\text{C}$  NMR spectrum of compound 5.

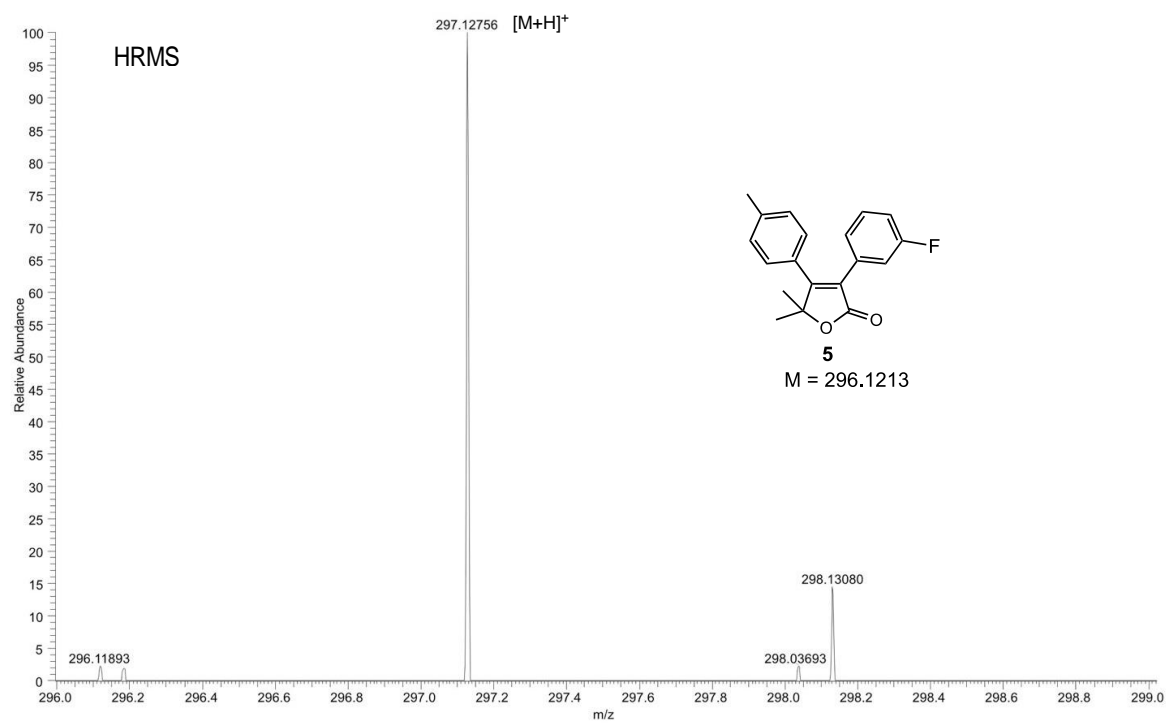

**Figure S19.** HRMS spectrum of compound **5**,  $m/z$  calculated for  $[C_{19}H_{17}FO_2 + H]^+$  297.1213, found 297.1275.

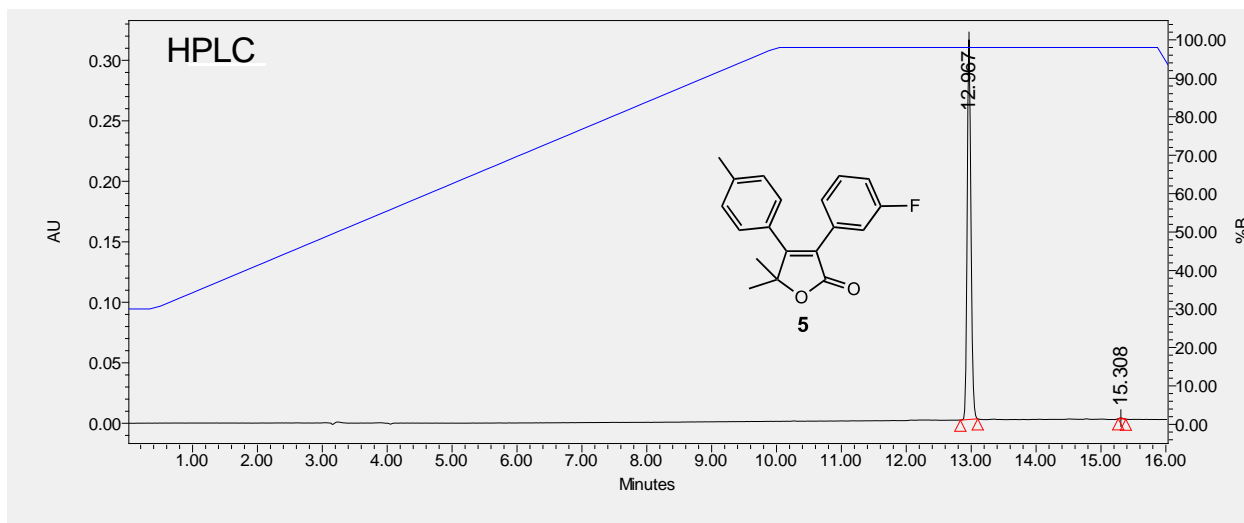

**Figure S20.** HPLC chromatogram of compound **5**.

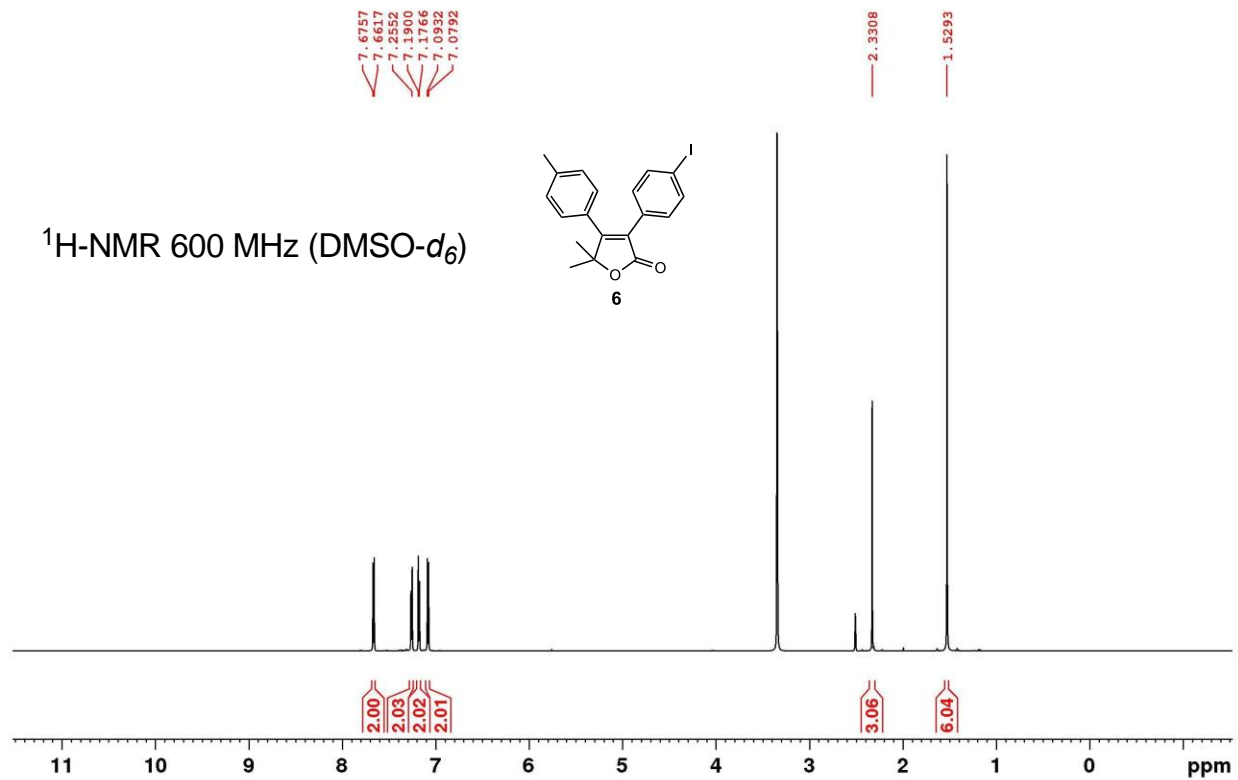

**Figure S21.** <sup>1</sup>H NMR spectrum of compound **6**.

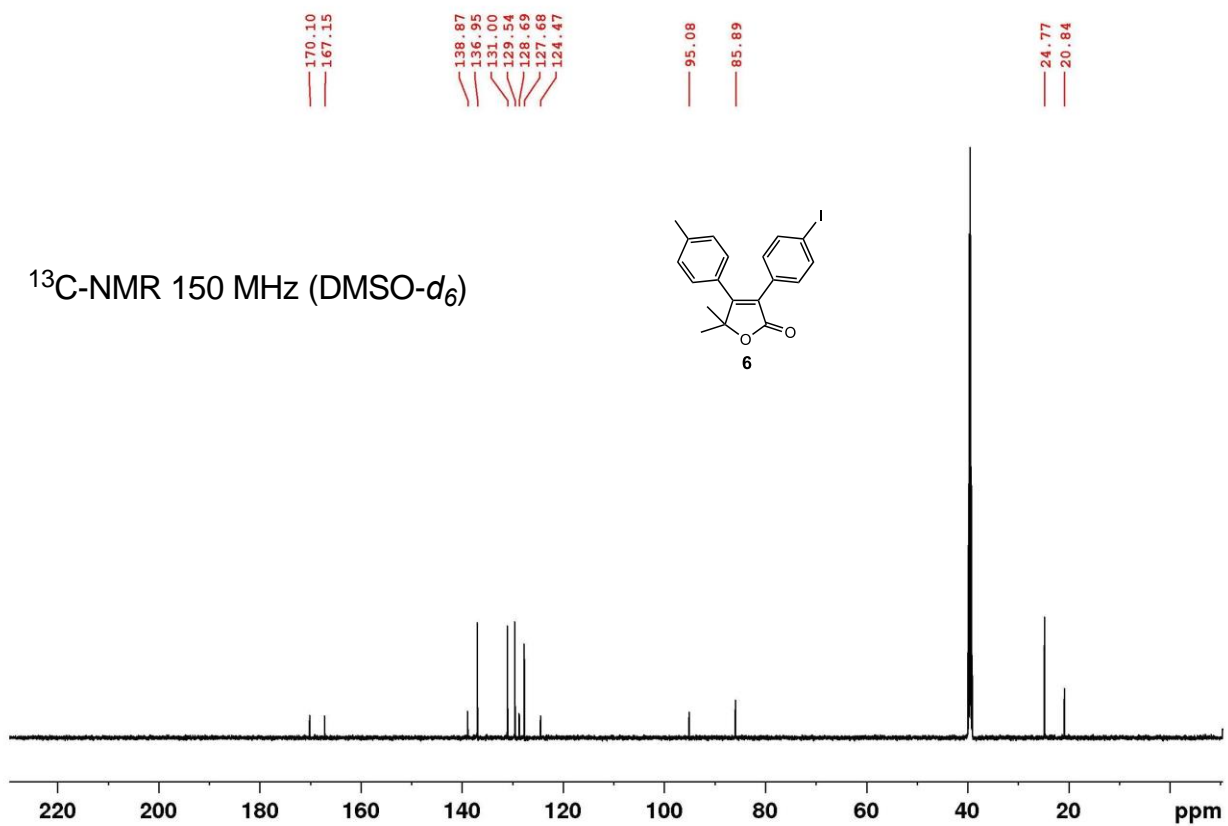

**Figure S22.**  $^{13}\text{C}$  NMR spectrum of compound **6**.



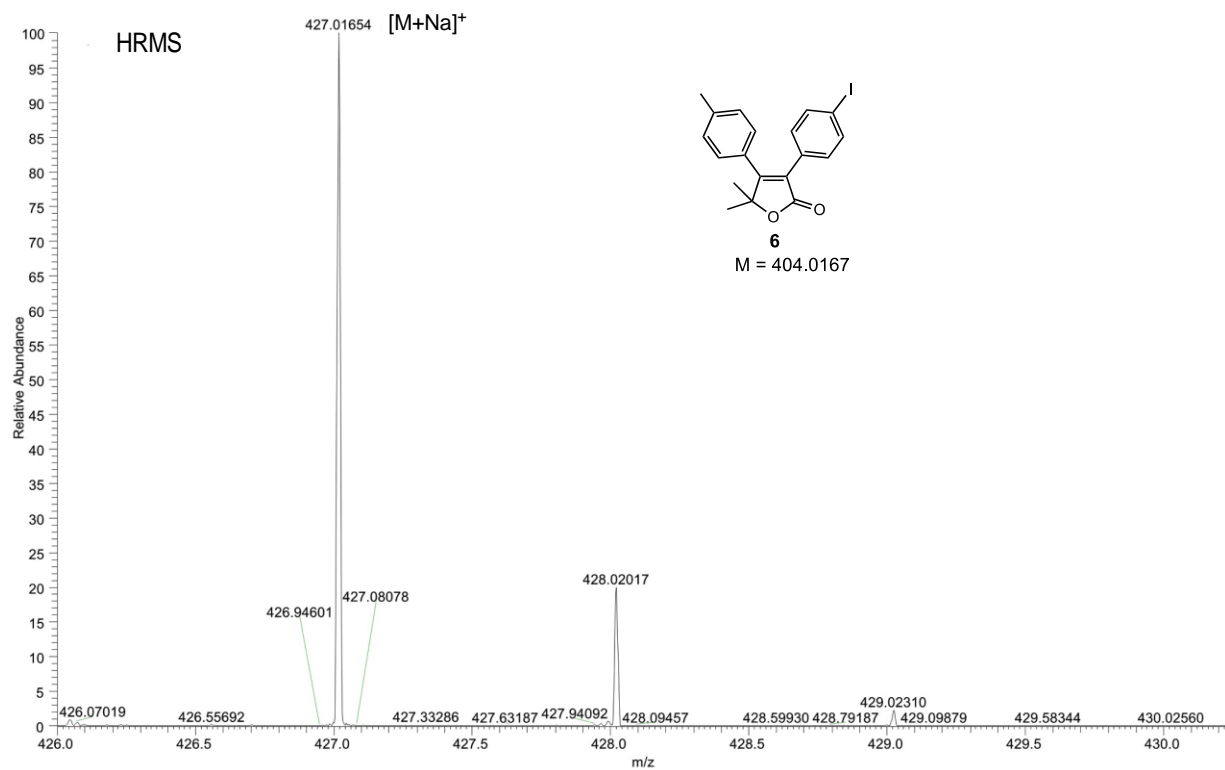

**Figure S23.** HRMS spectrum of compound **6**,  $m/z$  calculated for 427.0167 [C<sub>19</sub>H<sub>17</sub>I O<sub>2</sub> + Na]<sup>+</sup>, found 427.0165.

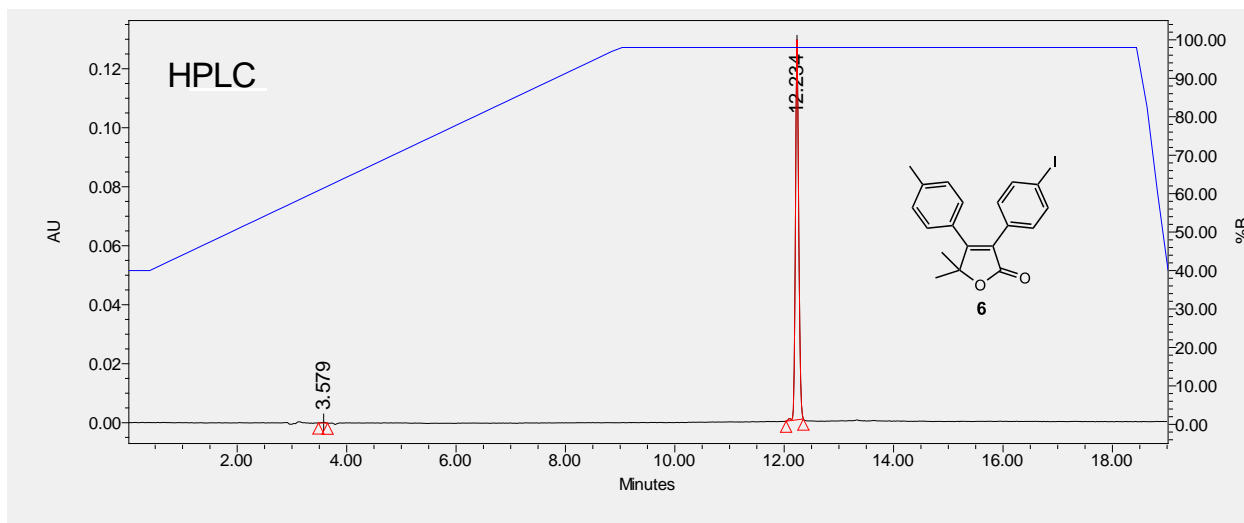

**Figure S24.** HPLC chromatogram of compound **6**.

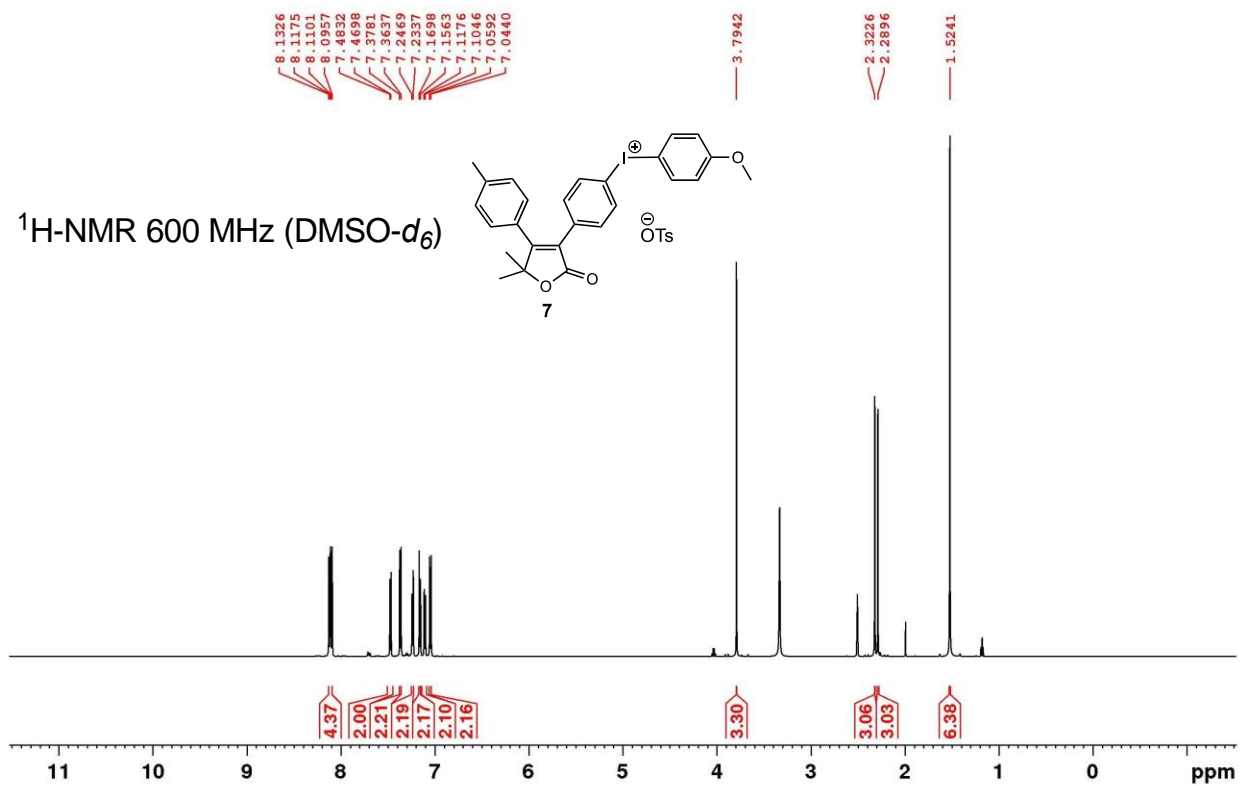

Figure S25.  $^1\text{H}$  NMR spectrum of compound 7.

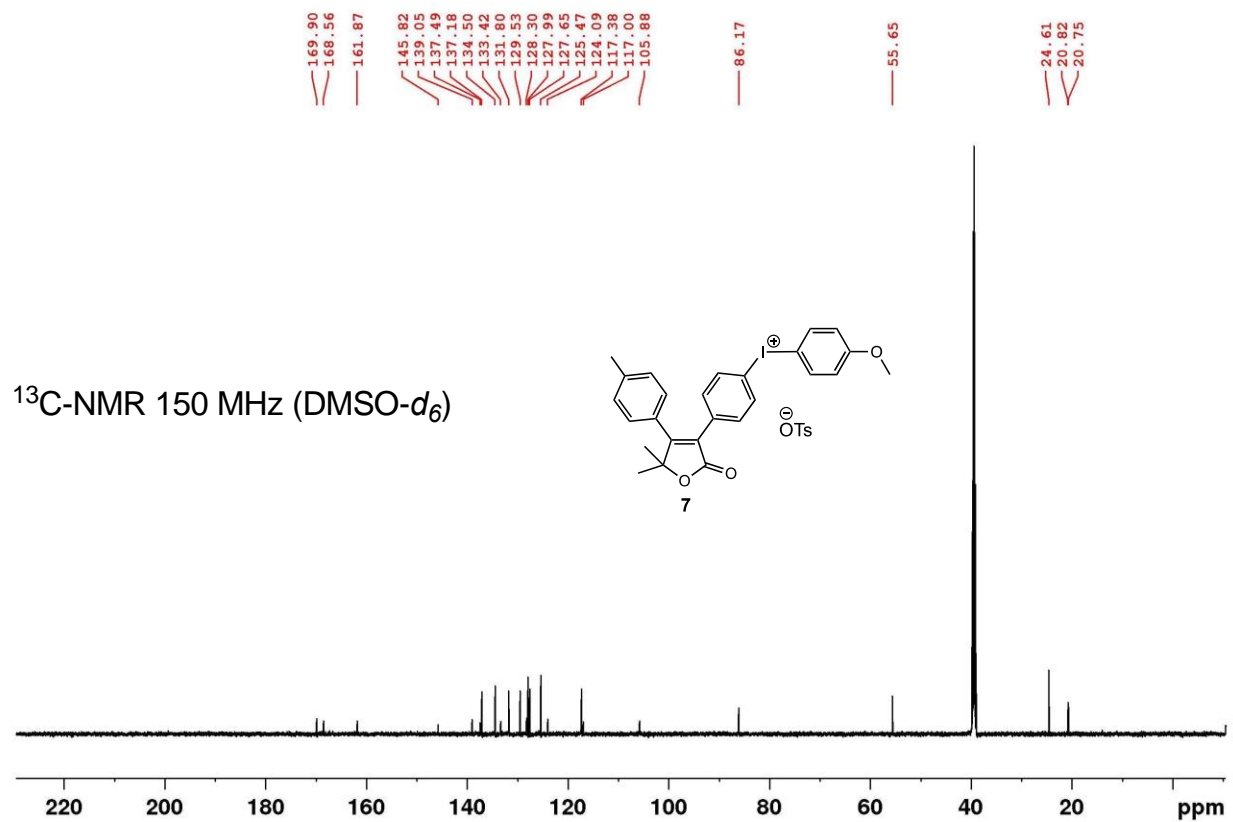

Figure S26.  $^{13}\text{C}$  NMR spectrum of compound 7.

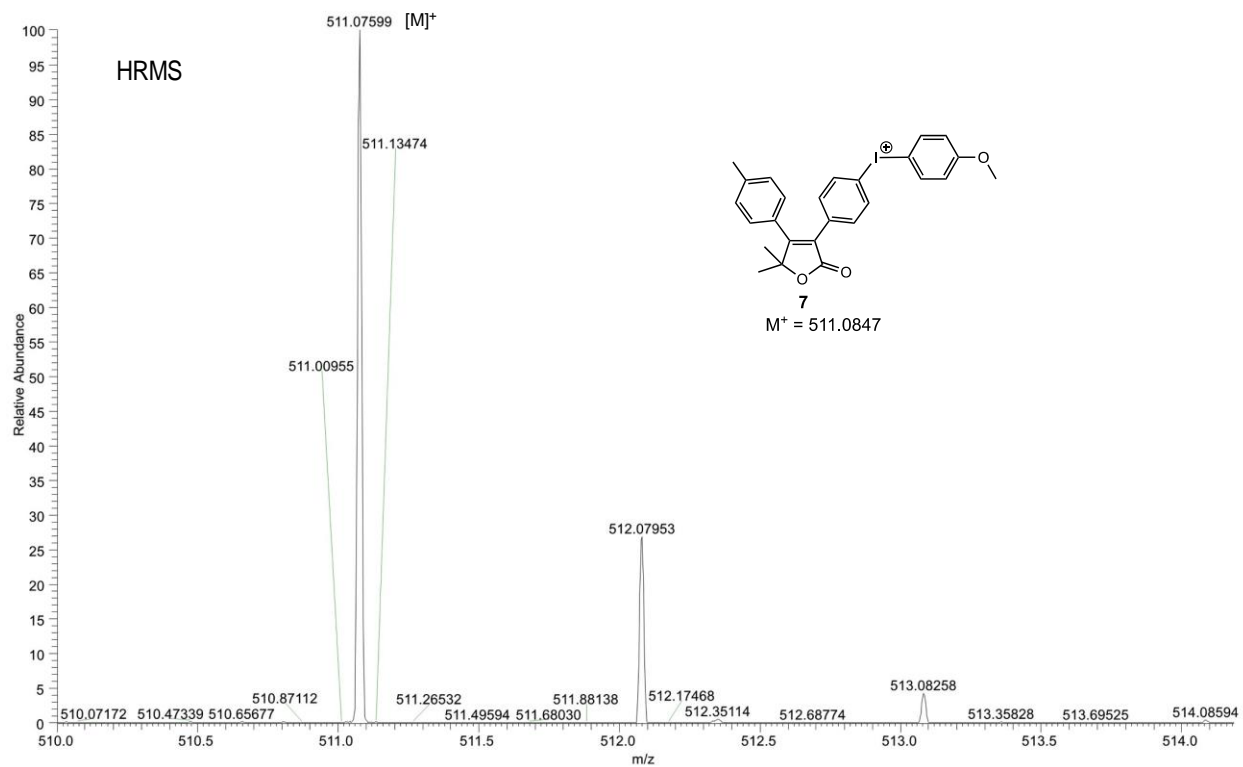

**Figure S27.** HRMS spectrum of compound **7**,  $m/z$  calculated for 511.0847 [C<sub>26</sub>H<sub>24</sub>IO<sub>3</sub>]<sup>+</sup>, found 511.0759.

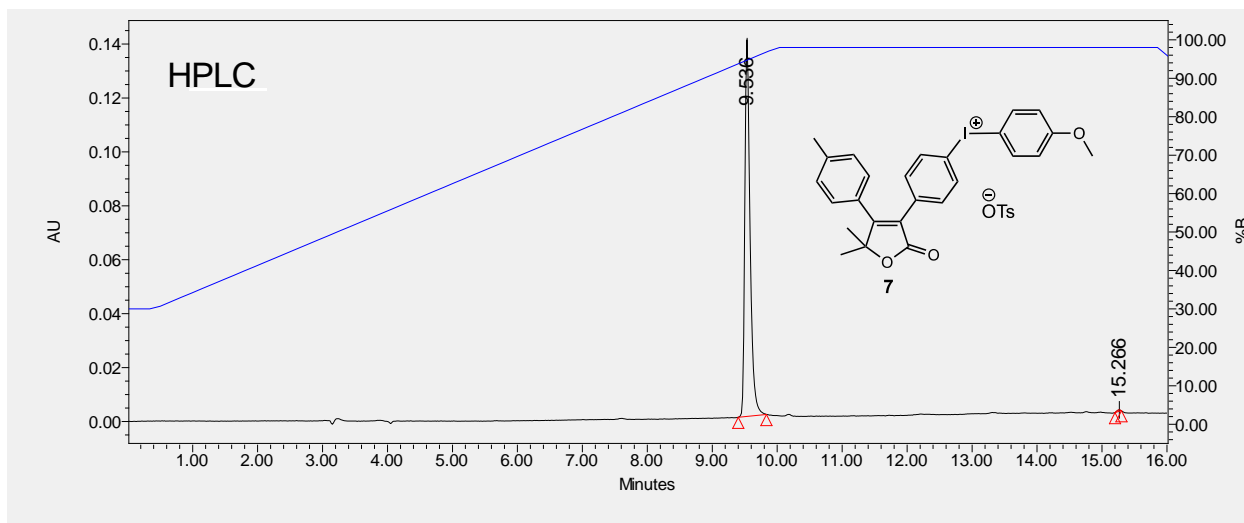

Figure S28. HPLC chromatogram of compound 7.

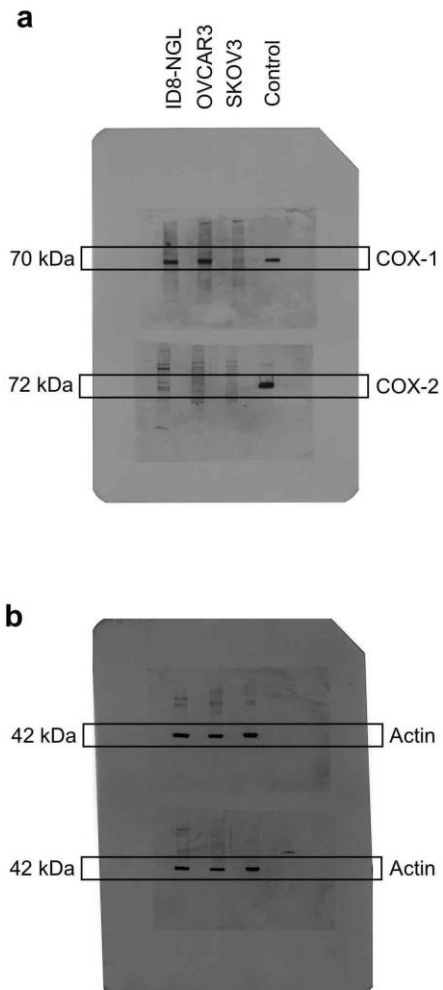

**Figure S29:** Full-length Western blots showing (a) COX-1 and COX-2 bands in ID8-NGL, OVCAR3 and SKOV3 cancer cells, and (b) actin bands as loading control.

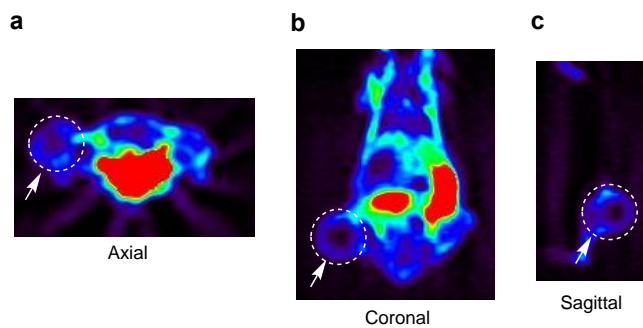

**Figure S30:** In vivo [ $^{18}\text{F}$ ]FDF PET (650  $\mu\text{Ci}$  (0.0241 GBq), intraperitoneal injection,  $t = 30 \text{ min}$ ) images of a female nude mouse bearing a SKOV3/COX-1 subcutaneous xenograft tumor in (a) axial, (b) coronal, and (c) sagittal views.



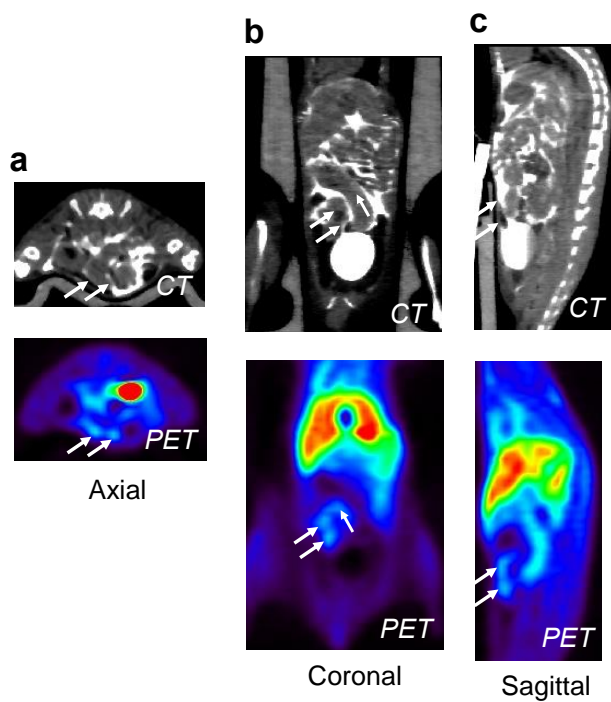

**Figure S31:** *In vivo* [ $^{18}\text{F}$ ]FDF PET with (612  $\mu\text{Ci}$  (0.0226 GBq), retro-orbital injection,  $t = 5 \text{ min}$ ) images of a female nude mouse bearing a SKOV3/COX-1 intraperitoneal tumors in (a) axial, (b) coronal, and (c) sagittal views.
